# Supplementary material for: Automated Alphabet Reduction for Protein Datasets
Source: Springer Nature journal article supplement (doi:10.1186/1471-2105-10-6), 2009-01-06
Supplement: Additional file 1 [file 1471-2105-10-6-s1.pdf]

# Automated Alphabet Reduction for Protein Datasets

## Supplementary Material

Jaume Bacardit<sup>\*1,2</sup>, Michael Stout<sup>1,2</sup>, Jonathan D. Hirst<sup>3</sup>, Alfonso Valencia<sup>4</sup>, Robert E. Smith<sup>5</sup> and Natalio Krasnogor<sup>\*1</sup>

<sup>1</sup>ASAP research group, School of Computer Science, University of Nottingham, Jubilee Campus, Wollaton Road, Nottingham, NG8 1BB, UK

<sup>2</sup>MYCIB, School of Biosciences, University of Nottingham, Sutton Bonington, LE12 5RD, UK

<sup>3</sup>School of Chemistry, University of Nottingham, University Park, Nottingham, NG7 2RD, UK

<sup>4</sup>Spanish National Cancer Research Centre, Melchor Fdez Almagro, 3. 28029 Madrid, Spain

<sup>5</sup>Dept. of Computer Science, University College London, Gower Street, London, WC1E 6BT, UK

Email: JB\* - jaume.bacardit@nottingham.ac.uk; MS - mqs@cs.nott.ac.uk; JDH - jonathan.hirst@nottingham.ac.uk; AV - valencia@cno.es; RES - robert.elliott.smith@gmail.com; NK\* - natalio.krasnogor@nottingham.ac.uk;

\*Corresponding author

Table 1: Alphabet reductions for all training partitions and MI Strategy for the CN dataset

| Alphabet size | Training set              | Groups of letters         |
|---------------|---------------------------|---------------------------|
| 2             | 1-10                      | ACFGHILMVWY/DEKNPQRSTX    |
| 3             | 1                         | ACFILMVY/DEKNPQRX/GHSTW   |
|               | 2-10                      | ACFILMVWY/DEKNPQRX/GHST   |
| 4             | 1                         | ACIMV/DEKPRX/FHLNWX/GQST  |
|               | 2,3                       | AFHTY/CILMV/DEKPQX/GNRSW  |
|               | 4,9                       | AFMSY/CHILV/DEKPQX/GNRTW  |
|               | 5                         | AFVY/CILMSW/DEKQRX/GHNPT  |
|               | 6                         | AFMSY/CILVW/DGHNR/EKPQTX  |
|               | 7                         | AFHNWY/CILMV/DEKQRX/GPST  |
| 5             | 8,10                      | AFTWY/CILMV/DEKPQX/GHNRS  |
|               | 1                         | ACIR/DENQX/FLMS/GKPW/HTVY |
|               | 2                         | ACFI/DKPQX/EHRWS/GMNT/LVY |
|               | 3                         | ACNP/DEKQX/FLTW/GHRS/IMVY |
|               | 4                         | AFT/CGHIM/DEKQX/LRSW/NPVY |
|               | 5                         | AIT/CLVW/DKQRX/ENPS/FGHMY |
|               | 6                         | AFV/CHLSW/DEKQX/GIMY/NPRT |
|               | 7                         | AFMWY/CHLT/DNPR/EKQSX/GIV |
|               | 8                         | AHVW/CFLS/DEKQX/GIMY/NPRT |
|               | 9                         | ACMV/DENQX/FLTW/GHIY/KPRS |
| 10            | ACMV/DEPQX/FLTW/GHIY/KNRS |                           |

Table 2: Alphabet reductions for all training partitions and RMI Strategy for the CN dataset

| Alphabet size | Training set | Groups of letters        |
|---------------|--------------|--------------------------|
| 2             | 1-10         | ACFGHILMVWY/DEKNPQRSTX   |
| 3             | 1-10         | ACFILMVWY/DEKNPQRX/GHST  |
| 4             | 1-6,8-9      | ACLM/DEKNPQRSTX/FIVW/GHY |
|               | 7,10         | ALMY/CFIV/DEKNPQRSTX/GHW |

Table 3: Alphabet reductions for all training partitions and DualRMI Strategy for the CN dataset

| Alphabet size | Training set             | Groups of letters        |
|---------------|--------------------------|--------------------------|
| 2             |                          | Target                   |
|               | 1-10                     | ACFILMVWY/DEGHKNPQRSTX   |
|               |                          | Other residues           |
|               | 1-10                     | ACFGHILMSTVWY/DEKNPQRX   |
| 3             |                          | Target                   |
|               | 1-2,4-6,8-10             | ACFILMVWY/DEKNQR/GHPSTX  |
|               | 3,7                      | ACFILMVWY/DEKNPQR/GHSTX  |
|               |                          | Other residues           |
|               | 1-2,5-6,9                | ACGHSTW/DEKNPQRX/FILMVY  |
|               | 3,7                      | AGHSTW/CFILMVY/DEKNPQRX  |
|               | 4                        | AGHSTWY/CFILMV/DEKNPQRX  |
|               | 8,10                     | ACGHSTWY/DEKNPQRX/FILMV  |
| 4             |                          | Target                   |
|               | 1,7,10                   | AMW/CLY/DEGHKNPQRST/FIV  |
|               | 2                        | ALM/CFI/DEGHKNPQRST/VWY  |
|               | 3,5                      | AM/CFIVW/DEGHKNPQRST/LY  |
|               | 4                        | AWY/CFILMV/DEKNPQR/GHST  |
|               | 6                        | ALY/CFI/DEGHKNPQRST/MVW  |
|               | 8                        | AW/CFILMVY/DEKNPQR/GHST  |
|               | 9                        | AM/CFIV/DEGHKNPQRST/LWY  |
|               |                          | Other residues           |
|               | 1,7,10                   | ACLY/DEKNPQRSX/FIMV/GHTW |
| 2-3,5-6       | ACLM/DEKNPQRSX/FIVW/GHTY |                          |
|               | 4                        | ACGHMTWY/DEKNPQRSX/FILV  |
|               | 8                        | ACGHWY/DEKNPQRSTX/FILMV  |
|               | 9                        | ACHLW/DEKNPQRSX/FIMV/GTY |
| 5             |                          | Target                   |
|               | 1,3                      | AM/CFIV/DEKNPQR/GHST/LWY |
|               | 2                        | AMW/CFI/DEHKNPQRST/GY/LV |
|               | 4,10                     | AMW/CFIV/DEKNPQR/GHST/LY |
|               | 5                        | AM/CIV/DEHKNPQRST/FLW/GY |
|               | 6                        | AY/CFMVW/DEKNPQR/GHST/IL |
|               | 7                        | AM/CFWY/DEKNPQR/GHST/ILV |
|               | 8                        | AMW/CFL/DEKNPQRST/GHY/IV |
|               | 9                        | AM/CFLW/DEKNPQRST/GHY/IV |
|               |                          | Other residues           |
| 1-2,4-5,9     | ALMY/CGHW/DEKNPQRSTX/FIV |                          |
| 3,6-8,10      | ACLMY/DEKNPQRSTX/FIV/GHW |                          |

Table 4: Alphabet reductions for all training partitions and MI Strategy for the RSA dataset

| Alphabet size | Training set | Groups of letters         |
|---------------|--------------|---------------------------|
| 2             | 1-10         | ACFILMVWY/DEGHKNPQRSTX    |
| 3             | 1-10         | AGHNPST/CFILMVWY/DEKQRX   |
| 4             | 1            | ACHIMT/DEKQP/FLVWY/GNRSX  |
|               | 2            | AHMOVY/CFILS/DEKQR/GNPSTX |
|               | 3            | AHMTWY/CFILV/DEKNQ/GPRSTX |
|               | 4            | AFHTY/CILMVW/DEKQP/GNRSX  |
|               | 5            | AFHSY/CILMVW/DGNT/EKPQRX  |
|               | 6            | AFGMW/CILVY/DEKNQ/HPRSTX  |
|               | 7            | AGMWY/CFILV/DEKNQ/HPRSTX  |
|               | 8            | AGMWY/CFILV/DEKQRX/HNPST  |
|               | 9            | AIVY/CFHLSW/DGNT/EKPQRX   |
|               | 10           | AFGY/CILMVW/DHNST/EKPQRX  |
| 5             | 1            | ACIR/DENQX/FLMS/GKPW/HTVY |
|               | 2            | ACFI/DKPQX/EHRWS/GMNT/LVY |
|               | 3            | ASAP/DEKQX/FLTW/GHRS/IMVY |
|               | 4            | AFT/CGHIM/DEKQX/LRSW/NPVY |
|               | 5            | AIT/CLVW/DKQRX/ENPS/FGHMY |
|               | 6            | AFV/CHLSW/DEKQX/GIMY/NPRT |
|               | 7            | AFMWY/CHLT/DNPR/EKQXS/GIV |
|               | 8            | AHVW/CFLS/DEKQX/GIMY/NPRT |
|               | 9            | ACMV/DENQX/FLTW/GHIY/KPRS |
|               | 10           | ACMV/DEPQX/FLTW/GHIY/KNRS |

Table 5: Alphabet reductions for all training partitions and RMI Strategy for the SA dataset

| Alphabet size | Training set | Groups of letters        |
|---------------|--------------|--------------------------|
| 2             | 1-10         | ACFILMVWY/DEGHKNPQRSTX   |
| 3             | 1,3-4,8-9    | AGHPST/CFILMVWY/DEKNQRX  |
|               | 2,6          | AGHNPST/CFILMVWY/DEKQRX  |
|               | 5,7,10       | AGHST/CFILMVWY/DEKNPQRX  |
| 4             | 1-10         | AGHST/CFILMVWY/DEKNPQR/X |

Table 6: Alphabet reductions for all training partitions and DualRMI Strategy for the SA dataset

| Alphabet size | Training set             | Groups of letters                                                                |
|---------------|--------------------------|----------------------------------------------------------------------------------|
| 2             | Target                   |                                                                                  |
|               | 1-10                     | ACFILMVWY/DEGHKNPQRSTX                                                           |
|               | Other residues           |                                                                                  |
|               | 1,3-10<br>2              | ACFGHILMNRSTVWY/DEKPQX<br>ACFGHILMTVWY/DEKNPQRSX                                 |
| 3             | Target                   |                                                                                  |
|               | 1-10                     | AGHST/CFILMVWY/DEKNPQR                                                           |
|               | Other residues           |                                                                                  |
|               | 1-9<br>10                | AGNRST/CFHILMVWY/DEKPQX<br>AGHNRST/CFILMVWY/DEKPQX                               |
| 4             | Target                   |                                                                                  |
|               | 1                        | AGHST/CFILMVWY/DEK/NPQR                                                          |
|               | 2-3,6-8,10               | AY/CFILMVW/DEKNQR/GHPST                                                          |
|               | 4                        | AY/CFILMVW/DEKQR/GHNPST                                                          |
|               | 5,9                      | AH/CFILMVWY/DEKNQR/GPST                                                          |
|               | Other residues           |                                                                                  |
|               | 1-2<br>3,5-7,9           | AGNPST/CFHILMVWY/DEKQR/X<br>AGNST/CFHILMVWY/DEKPQR/X                             |
|               | 4<br>8<br>10             | AGRST/CFHILMVWY/DEKNPQ/X<br>AGPST/CFHILMVWY/DEKNQR/X<br>ACFILMVWY/DEKPQ/GHNRST/X |
| 5             | Target                   |                                                                                  |
|               | 1,5-8                    | A/CFILMVWY/DNPQR/EK/GHST                                                         |
|               | 2-3,6,9                  | AY/CFILMVW/DEK/GHST/NPQR                                                         |
|               | 4                        | AY/CFILMVW/DEKQ/GHST/NPR                                                         |
|               | 10                       | AY/CFILMVW/DNPQR/EK/GHST                                                         |
|               | Other residues           |                                                                                  |
|               | 1,5,7-8                  | ACFHILMVWY/DEKNPQRST/G/X                                                         |
|               | 2,4                      | AGRST/CFHILMVWY/DEKNPQ/X                                                         |
|               | 3,10                     | ACFILMVWY/DEKPQR/GHNS/X                                                          |
| 6             | AGNRST/CFHILMVWY/DEKPQ/X |                                                                                  |
| 9             | AGNRST/CFHILMVWY/DEKPQX  |                                                                                  |
